# Supplementary material for: World impact of kernel European Union 9 countries from Google matrix analysis of the world trade network
Source: Springer Nature journal article supplement (doi:10.1007/s41109-021-00380-9), 2021-05-26
Supplement: MOESM1 [file 19200698]

**SUPPORTING INFORMATION FOR:  
World impact of kernel EU 9 countries  
from Google matrix analysis of UN COMTRADE network**

Justin Loye<sup>1,2</sup>, Leonardo Ermann<sup>3,4</sup>, Dima L. Shepelyansky<sup>1,\*</sup>

1 Laboratoire de Physique Théorique du CNRS, IRSAMC, Université de Toulouse, CNRS, UPS, 31062 Toulouse, France

2 Institut de Recherche en Informatique de Toulouse, Université de Toulouse, UPS, 31062 Toulouse, France

3 Departamento de Física Teórica, GIyA, Comisión Nacional de Energía Atómica. Av. del Libertador 8250, 1429 Buenos Aires, Argentina

4 Consejo Nacional de Investigaciones Científicas y Técnicas (CONICET), Buenos Aires, Argentina

\* Webpage: [www.quantware.ups-tlse.fr/dima](http://www.quantware.ups-tlse.fr/dima)

## **Additional data**

Here we present additional Figures related to the material presented in the main part of the article.

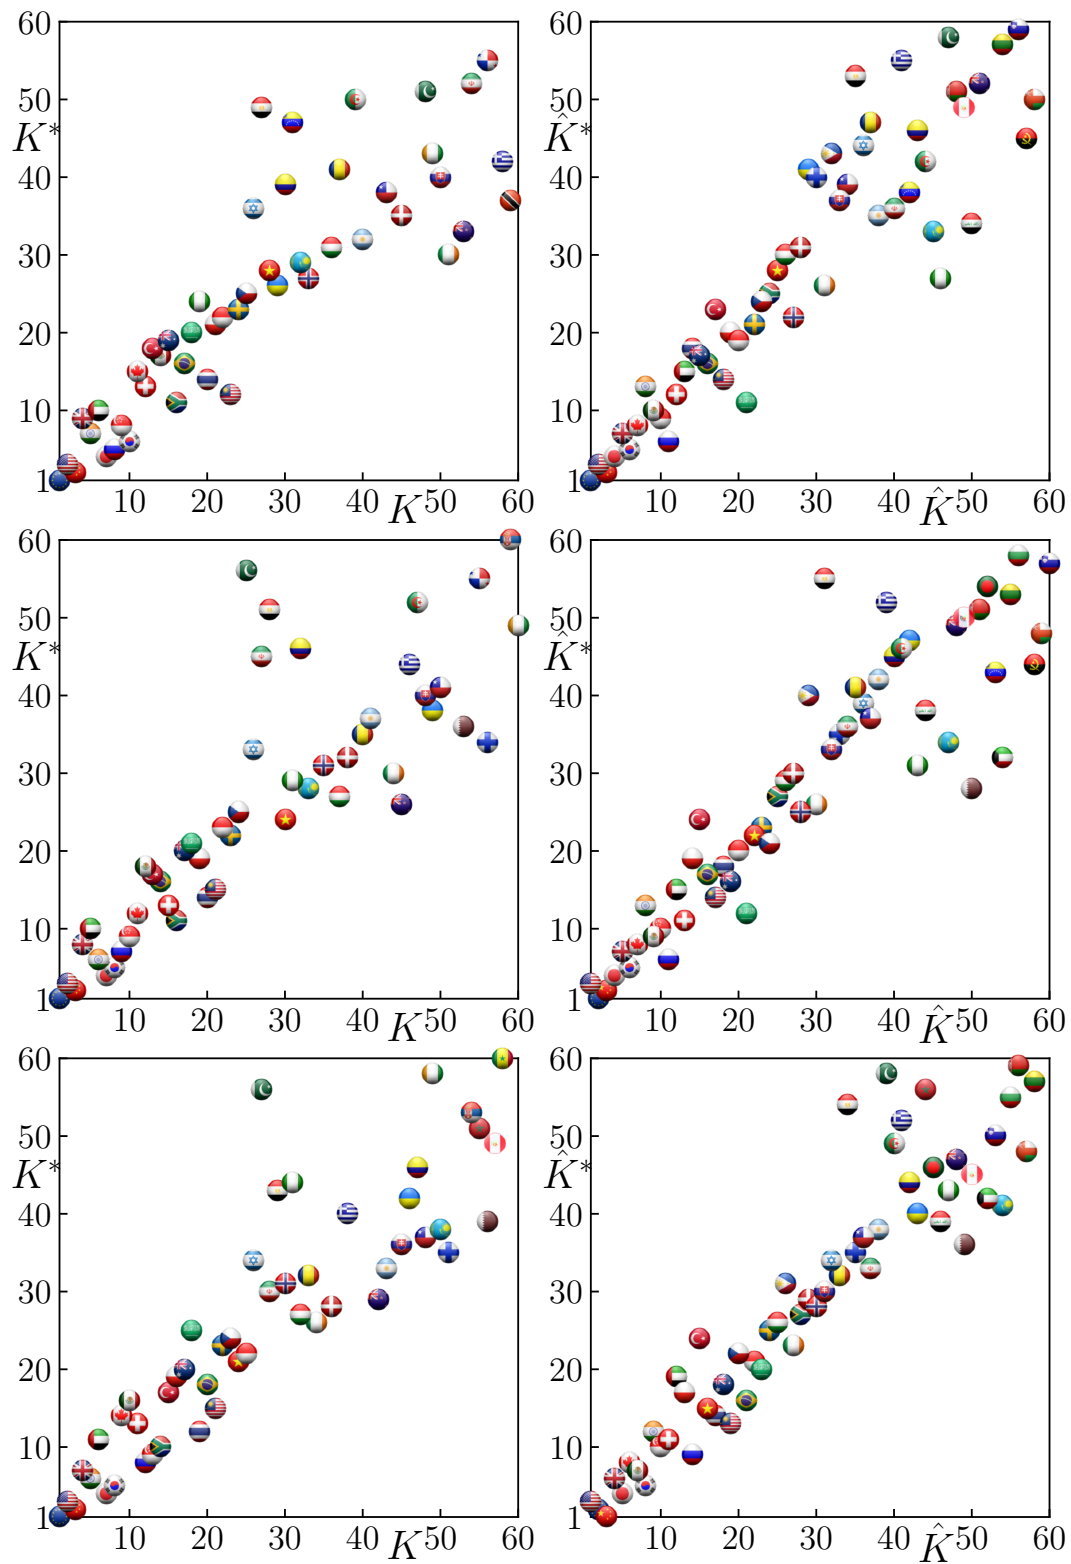

**Figure A1.** Same as Fig.1 for years 2012, 2014, 2016 (from top to bottom).

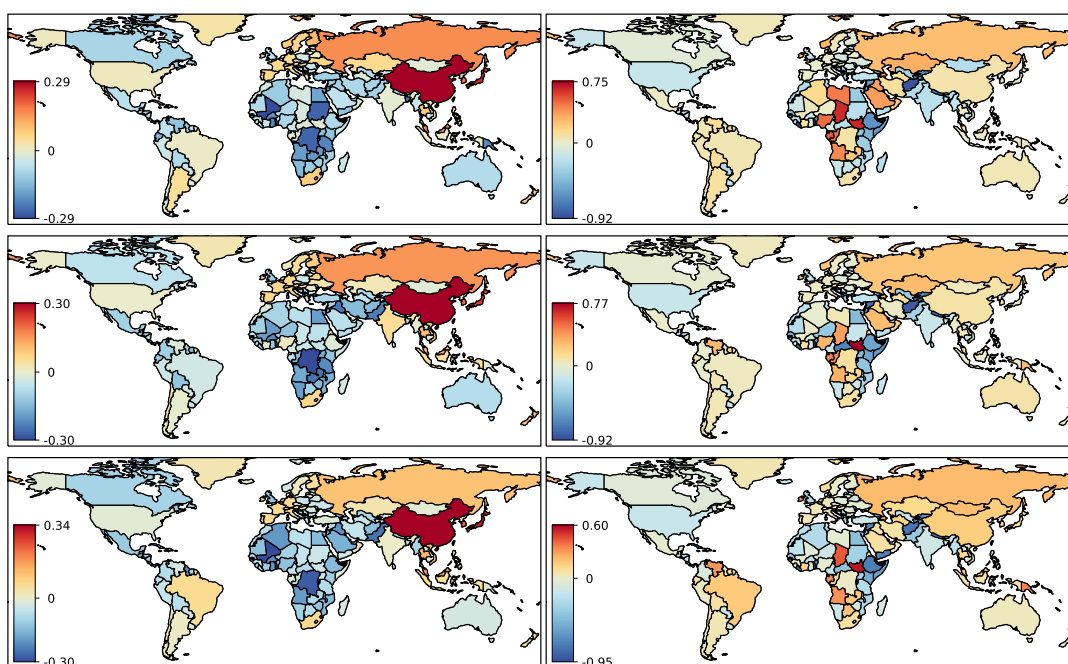

**Figure A2.** Same as Fig.2, left column shows data from CheiRank and PageRank vectors, right column shows data from Export and Import volumes; data are given for years 2012, 2014, 2016 (from top to bottom).

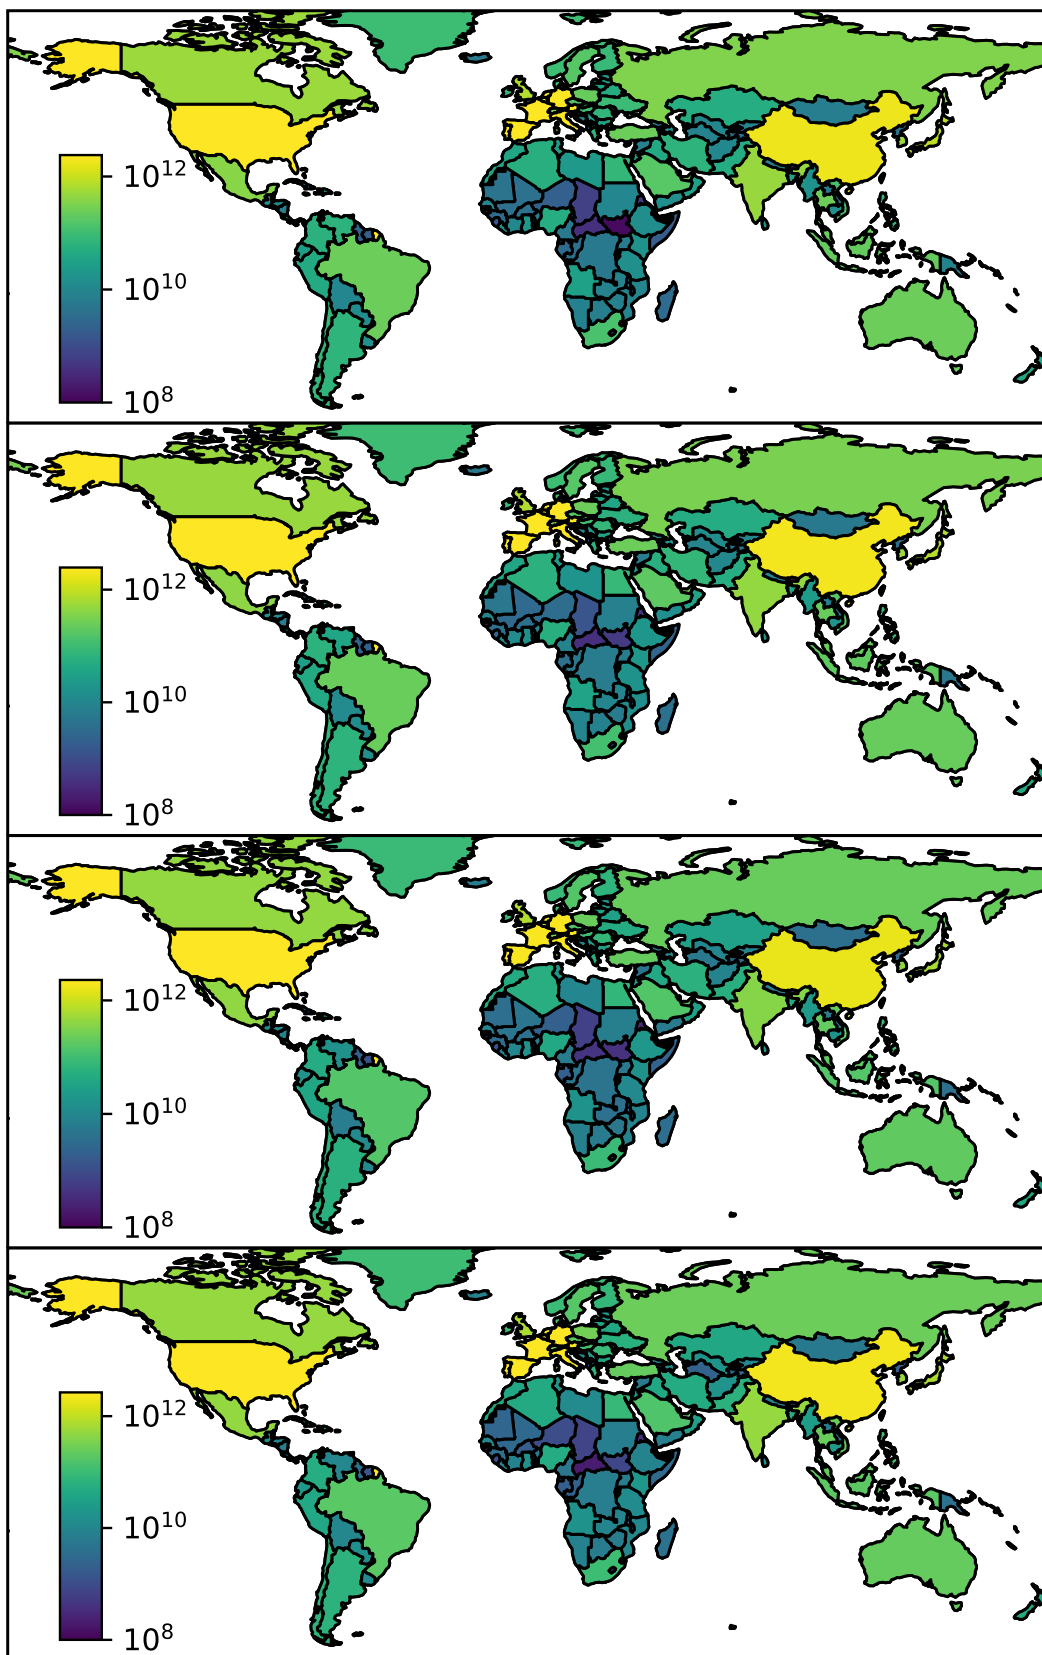

**Figure A3.** World map of countries Import volume in USD for years 2012, 2014, 2016 (from top to bottom); values lower than  $10^8$  are clipped for better visibility.

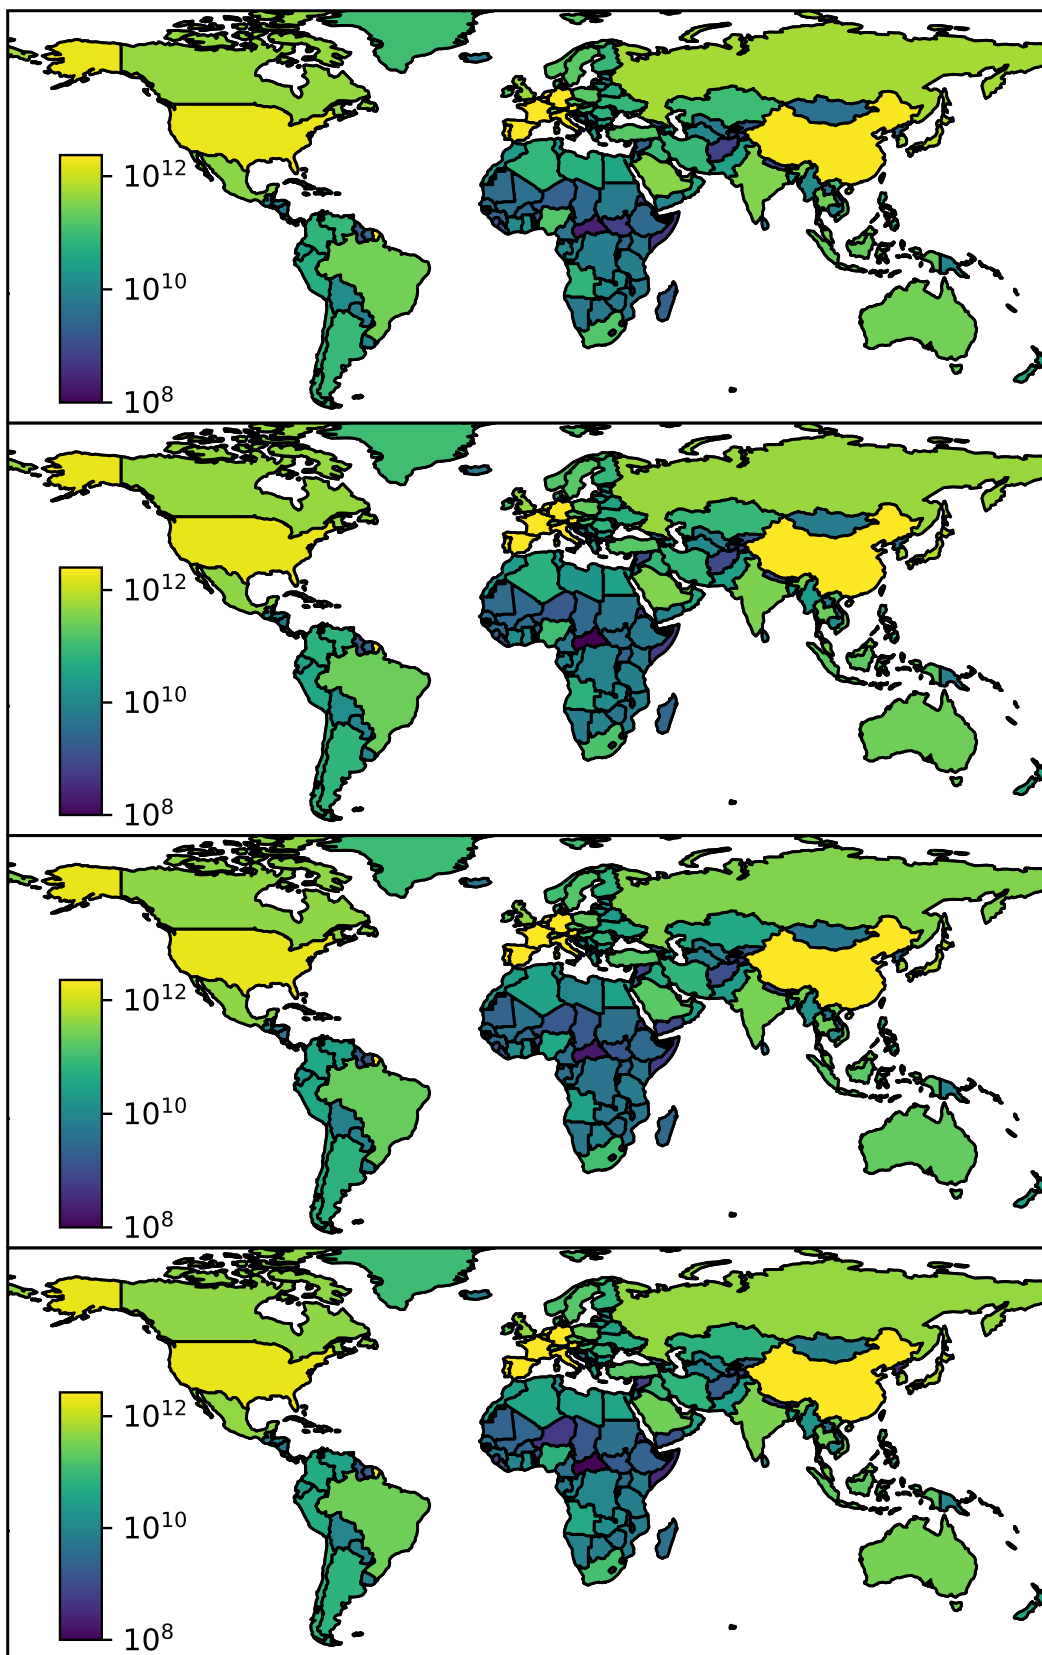

**Figure A4.** World map of countries Export volume in USD for years 2012, 2014, 2016 (from top to bottom); values lower than  $10^8$  are clipped for better visibility.

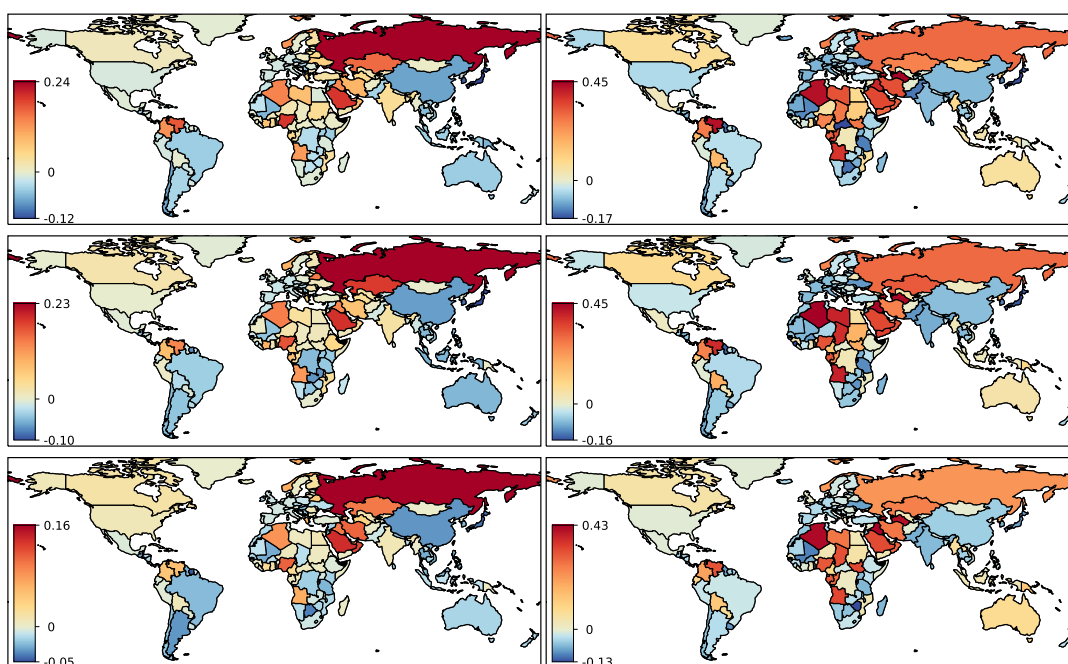

**Figure A5.** Same as Fig.3, left column shows data from CheiRank and PageRank vectors, right column shows data from Export and Import volumes; data are given for years 2012, 2014, 2016 (from top to bottom).

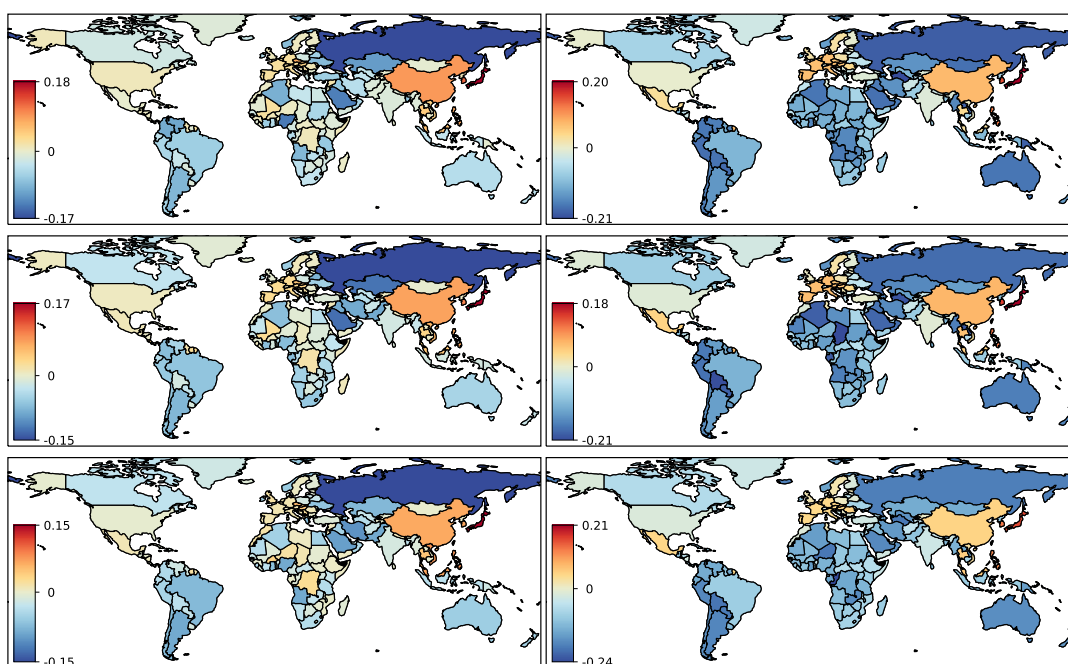

**Figure A6.** Same as Fig.4, left column shows data from CheiRank and PageRank vectors, right column shows data from Export and Import volumes; data are given for years 2012, 2014, 2016 (from top to bottom).
